# Why extinction estimates from extant phylogenies are so often zero

Stilianos Louca<sup>1,2,†,\*</sup> & Matthew W. Pennell<sup>3,4,†,\*</sup>

<sup>1</sup>*Department of Biology, University of Oregon, USA*

<sup>2</sup>*Institute of Ecology and Evolution, University of Oregon, USA*

<sup>3</sup>*Biodiversity Research Centre, University of British Columbia, Vancouver, Canada*

<sup>4</sup>*Department of Zoology, University of British Columbia, Vancouver, Canada*

<sup>†</sup>Both authors contributed equally to this work

\*Correspondence should be addressed to both authors: [www.loucalab.com](http://www.loucalab.com) and [pennell@zoology.ubc.ca](mailto:pennell@zoology.ubc.ca)

## Abstract

Time-calibrated phylogenies comprising only extant lineages are widely used to estimate historical speciation and extinction rates. Such extinction rate estimates have long been controversial as many phylogenetic studies report zero extinction in many taxa, a finding in conflict with the fossil record. To date, the causes of this widely observed discrepancy remain unresolved. Here we provide a novel and simple explanation for these “zero-inflated” extinction rate estimates, based on the recent discovery that there exist many alternative “congruent” diversification scenarios that cannot possibly be distinguished on the sole basis of extant timetrees. Consequently, estimation methods tend to converge to some scenario congruent to (i.e., statistically indistinguishable from) the true diversification scenario, but not necessarily to the true diversification scenario itself. This congruent scenario may in principle exhibit negative extinction rates, a biologically meaningless but mathematically feasible situation, in which case estimators will tend to hit and stick to the boundary estimate of zero extinction. To test this explanation, we estimated extinction rates using maximum likelihood for a set of simulated trees and for 121 empirical trees, while either allowing or preventing negative extinction rates. We find that the existence of congruence classes and imposed bounds on extinction rates can explain the zero-inflation of previous extinction rate estimates, even for large trees (1000 tips) and in the absence of any detectable model violations. Not only do our results likely resolve a long-standing mystery in phylogenetics, they demonstrate that model congruencies can have severe consequences in practice.

**Keywords:** extinction; macroevolution; phylogenetic trees; identifiability

## 20 Introduction

21 Understanding the historical dynamics of species formation and extinction is critical to explaining patterns of  
22 biodiversity (1, 2) and for quantifying the influence of environmental factors and human activity on the bio-  
23 sphere (3). The branching pattern of time-calibrated phylogenies of extant species (“extant timetrees”) is an  
24 important source of evidence, in addition to the fossil record, for reconstructing these dynamics; researchers  
25 thus often attempt to estimate speciation and extinction rates by fitting stochastic birth-death models to extant  
26 timetrees (4). Despite the widespread use of such phylogenetic approaches, there has been an enduring dis-  
27 crepancy that has never been satisfactorily explained: Analyses of extant timetrees using birth-death models  
28 often suggest that extinction rates were zero or negligible (5–11), contradicting the observation of high ex-  
29 tinction rates in the fossil record and the fact that the majority of species ever to have existed are now extinct  
30 (2, 10). For example, Herrera (11) analyzed phylogenetic and fossil data of primates and observed that the  
31 phylogenetic data suggested negligible extinction rates while fossils showed that extinction rates were nearly  
32 equal to speciation rates.

33 Various explanations have been proposed for why extinction rates may be misestimated from phylo-  
34 genies, all of which essentially invoke some type of model inadequacy (8, 12–15). However, the proposed  
35 mechanisms do not fully explain the observation that extinction rate estimates based on extant phylogenies  
36 are suspiciously often zero. Indeed, Rabosky (12) and Beaulieu *et al.* (14) showed that heterogeneity in  
37 rates across lineages (a violation of the assumption of homogeneity in birth-death models) often leads to  
38 an inflation — rather than deflation — of extinction rate estimates when these are obtained via birth-death  
39 model fitting (Fig. 3 therein). Similarly, Morlon *et al.* (13) proposed that failing to adequately account for  
40 variation in rates over time can lead to erroneous extinction rate estimates, although they never explained  
41 why this should specifically cause zero-inflated estimates. Purvis (8) suggested that biased species sampling  
42 or incompletely resolved phylogenies could lead to low extinction rate estimates. However, the mechanisms  
43 proposed by Purvis (8) are expected to alter extinction estimates by some factor, rather than completely erase  
44 any evidence for extinction. Importantly, it can be shown using simulations as well as empirical datasets  
45 (see below) that even when fitting birth-death models accounting for temporal variation, and even if trees  
46 are simulated under a birth-death model with homogenous rates across lineages and no sampling bias, ex-  
47 tinction rate estimates are zero-inflated. A zero-inflation of extinction rate estimates even in the absence of  
48 any model violations can even be seen in the simulation results by Rabosky (12) and Beaulieu *et al.* (14),  
49 although these studies did not provide any explanation for that phenomenon. A zero-inflation of extinction  
50 rate estimates even without any model violations cannot possibly be explained by the above mechanisms. It  
51 is also notable that birth-death models are routinely fit to paleontological data without considering across-  
52 lineage heterogeneity and assuming a fairly simple model of time-variability (e.g., piecewise constant across  
53 different time-bins; 16) and yet typically estimate extinction rates to be similarly high as speciation rates (2).

54 Here we propose a novel and simple explanation for why extinction rate estimates from extant time-  
55 trees are often zero. Our explanation follows from our recent discovery that extant timetrees are generally  
56 insufficient for resolving historical diversification dynamics in the context of birth-death models (17). In

57 contrast to other explanations, our reasoning holds true even in the absence of any model violations (i.e.,  
58 when the data was indeed generated by a birth-death model and when the fitted model captures the variation  
59 in the data perfectly) and thus can explain zero-inflated extinction rate estimates in a much broader range of  
60 situations. Using simulations, we demonstrate that the common approach of selecting between alternative  
61 birth-death models using AIC does not resolve this issue; the best fit of a set of models frequently suggests  
62 zero extinction rate estimates even when in reality extinction was clearly non-zero. As we detail below, our  
63 explanation leads to multiple non-trivial predictions, which we fully confirm using simulated and empirical  
64 timetrees.

## 65 **Results and Discussion**

### 66 **Model congruencies predicts zero-inflated extinction rate estimates**

67 Our starting point is the general stochastic birth-death model with arbitrary time-dependent speciation rate  
68  $\lambda$ , time-dependent extinction rate  $\mu$  and random lineage sampling at present day with sampling fraction  $\rho$   
69 (13, 17). Note that here we use “diversification scenario” to refer to a single specific choice of  $\lambda$  and  $\mu$  over  
70 time, as well as a specific value of  $\rho$ . We recently showed that historical diversification dynamics cannot be  
71 unambiguously reconstructed from extant timetrees alone (17): for any given diversification scenario there  
72 exist many alternative (“congruent”) scenarios that would generate extant timetrees with the same probability  
73 distribution as the proposed scenario. Such congruent scenarios exhibit identical likelihood functions and  
74 cannot possibly be distinguished using extant timetrees alone, no matter how large and complete. The set of  
75 all congruent scenarios, called a “congruence class”, is infinitely large, infinite dimensional, and contains a  
76 myriad of similarly plausible and yet markedly different scenarios. Crucially, when fitting birth-death models  
77 to an extant timetree, either via maximum-likelihood or using Bayesian inference, estimators will generally  
78 converge towards the congruence class of the true diversification scenario but not necessarily to the true  
79 diversification scenario itself.

80 The above realization suggests that in practice extinction rate estimates obtained entirely from extant  
81 timetrees (no matter how large) will often be very wrong (17, 18). The question is: why are these (wrong)  
82 extinction rate estimates often exactly zero, instead of simply “random” positive numbers? In other words,  
83 why is the distribution of extinction rate estimates seen in the literature zero-inflated? We propose that the  
84 answer to this mystery stems from the fact that the likelihood function of a birth-death model is mathemati-  
85 cally well-defined even for extinction rates that are negative during some or all time points (19). If one were  
86 to consider models with partly or fully negative extinction rates, then the corresponding congruence class of  
87 the true historical diversification history, denoted  $\mathbb{H}$ , would include many additional scenarios with partly or  
88 fully negative  $\mu$  and yet positive  $\lambda$  (see for example Supplement S1.4 in (17) for constructing such congruent  
89 scenarios). Of course, a scenario with  $\mu < 0$  is biologically meaningless, but if one were to permit such  
90 scenarios, it could often be the case that such a scenario is “closest” to  $\mathbb{H}$  (i.e., has the highest likelihood)  
91 among the set of considered scenarios, even compared to those scenarios with positive  $\mu$ . This is not at

92 all paradoxical once one recognizes that what one is really estimating is the congruence class of the true  
93 diversification history and not the true diversification history itself and that any scenario with negative  $\mu$  is  
94 congruent to a myriad of scenarios with positive biologically plausible  $\mu$ . However, imposing the biologi-  
95 cally motivated constraint that  $\mu \geq 0$  places a boundary in parameter space that likelihood-optimizers and  
96 Bayesian samplers will tend to run up against, thus yielding estimates for  $\mu$  that are partly or entirely zero  
97 (illustration in Fig. 1A). Such situations can in principle occur for birth-death models of arbitrary complex-  
98 ity, for example with time-dependent  $\lambda$  and  $\mu$  (as we demonstrate below). Note that whether the fitted model  
99 exhibits negative extinction rates (if allowed) ultimately depends on the full set of scenarios considered (e.g.,  
100 the specific functional forms fitted).

101 Figure 1B–C illustrates the above reasoning using an empirical timetree of 293 Trochilidae (humming-  
102 bird) species (20). If we only consider scenarios where speciation and extinction rates are constant through  
103 time, the likelihood has its global maximum at a scenario with a negative extinction rate (Fig. 1B). As ex-  
104 pected, fitting constant-rates birth-death models to the Trochilidae tree yields a negative extinction rate when  
105  $\mu$  is allowed to be negative and a zero extinction rate when  $\mu$  is constrained to non-negative values (Fig. 1B).  
106 Importantly, in this case the fitted model with zero extinction rate actually explains the data very well (Fig.  
107 1C), and could not be rejected based on any model adequacy test considered (using parametric bootstrapping  
108 and considering the Sackin (21) and Colless (22) tree imbalance statistics, the distribution of edge lengths  
109 based on a Kolmogorov-Smirnov test, and the distribution of node ages based on a Kolmogorov-Smirnov  
110 test;  $P > 0.05$  in all cases). Hence, the fact that  $\mu$  is estimated to be zero is unlikely due to an inadequacy  
111 of the model to explain the data at hand; rather, the maximum-likelihood scenario with negative  $\mu$  is prob-  
112 ably congruent to another (biologically plausible) diversification scenario close to the true (but unknown)  
113 hummingbird diversification history.

114 Based on the above reasoning, we can make the following testable predictions for extinction rate es-  
115 timates obtained via maximum likelihood estimation (we do not consider Bayesian estimation in this paper,  
116 although similar arguments would apply). First, erroneously obtaining zero extinction rate estimates should  
117 be common even in situations without any detectable model violations, i.e., even where the fitted models ex-  
118 plain the data well. Second, in almost all cases where the extinction rate is erroneously estimated to be zero  
119 at one or more time points, one should obtain a negative extinction rate estimate at one or more time points  
120 if one were to allow for such estimates. In particular, when allowing negative extinction rates, the distribu-  
121 tion of estimated extinction rates should no longer be zero-inflated. Third, estimating a negative extinction  
122 rate (if allowed) should increase the chances of obtaining a zero extinction rate estimate when constrained  
123 to non-negative values (e.g., due to the optimization routine or sampler getting “trapped” on the  $\mu = 0$   
124 boundary). Note, however, that this is not a strict requirement, i.e., in some cases the estimated  $\mu$  might be  
125 negative if allowed and yet strictly positive if constrained, for example if the likelihood function has multiple  
126 local maxima. Fourth, in cases where the estimated extinction rate is positive even if allowed to be negative,  
127 this estimate should typically be similar to the estimate obtained when constraining  $\mu$  to be non-negative;  
128 this is again not a strict requirement due to the possibility of multiple local maxima and the fact that the  
129 optimal value for one parameter generally depends on the values of the other parameters. Fifth, fixing the

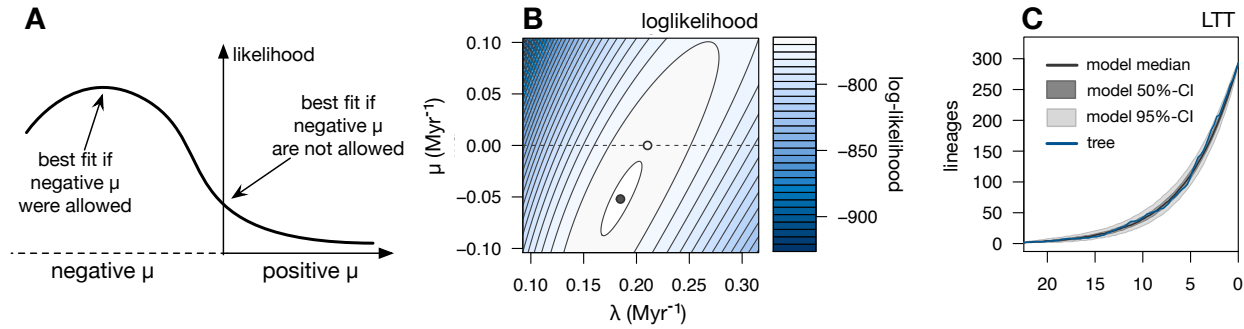

**Figure 1: Conceptual illustration.** (A) For any given extant timetree, the likelihood function will generally be maximized in a region of parameter space close to the congruence class of the true diversification history (including scenarios with partly or fully negative  $\mu$ ), but not necessarily close to the true diversification history itself. This maximum may even be located in a region where  $\mu < 0$ . Constraining  $\mu$  to be positive may merely result in a “compromised” fit where  $\mu = 0$ . In the above illustration we focus on  $\mu$  as a single fitted parameter for simplicity, however in practice fitted models may depend on multiple parameters, for example if  $\mu$  and  $\lambda$  have complex functional forms. (B) Contour-plot of the log-likelihood of an empirical timetree of 293 Trochilidae species (20), under constant-rate birth-death models with various speciation rates (horizontal axis) and extinction rates (vertical axis), and with fixed known sampling proportion. When extinction rates are allowed to be negative, the maximum-likelihood scenario exhibits a negative extinction rate (black dot). Constraining  $\mu$  to non-negative values will yield a maximum-likelihood estimate that is zero (white dot). The dashed horizontal line at the  $\mu = 0$  boundary is shown for reference. (C) Lineages-through-time (LTT) curve of the Trochilidae tree (blue curve), compared to LTTs generated by the fitted constant-rates birth-death model (black curve shows median, shades show 50% and 95% confidence intervals). Observe the good agreement between the model’s and the tree’s LTTs. The fitted model adequately describes the tree; it cannot be rejected using parametric bootstrapping based on the Sackin (21) and Colless (22) tree imbalance statistics, the distribution of node ages and the distribution of branch lengths.

130 speciation rate to its true value during fitting (thus, “collapsing” the congruence class to a single scenario)  
 131 should yield much more accurate extinction rate estimates and should eliminate their zero-inflation. Sixth,  
 132 even for fitted models with negative extinction rates, these models should be close to the true diversification  
 133 history’s congruence class (provided, of course, sufficient data for fitting and a sufficiently flexible model).  
 134 As we describe below, we confirmed all six predictions using numerical simulations, and also confirmed  
 135 predictions 2–4 using 121 previously published timetrees from across the Eukaryotic Tree of Life.

## 136 Analysis of simulated data

137 To test our predictions, we simulated 500 extant timetrees using birth-death scenarios with known  $\lambda$  and  $\mu$ ,  
 138 and then fitted models while either constraining  $\mu$  to be non-negative or allowing  $\mu$  to also attain negative  
 139 values ( $\lambda$  was always constrained to be non-negative, and  $\rho$  was fixed to its true value). To underscore the fact  
 140 that the underestimation of  $\mu$  is not simply due to stochasticity stemming from small data sets, we considered  
 141 large timetrees comprising 1000 tips. For simplicity, in all cases we focused on the extinction rate at present-  
 142 day (henceforth denoted  $\mu_o$ ), although all conclusions would apply similarly to any other time point. The  $\lambda$   
 143 and  $\mu$  used in every simulation were time-dependent and their profiles defined according to simple stochastic  
 144 processes (of Ornstein-Uhlenbeck type; 23). This approach was chosen in order to obtain a large variety of  
 145 realistically complex diversification dynamics, as typically observed in the fossil record (24). The present-

146 day  $\mu_o$  was chosen randomly and uniformly between  $0.1 \cdot \lambda_o$  and  $\lambda_o$ , and at all times  $\mu$  was constrained to  
147 between  $0.1 \cdot \lambda_o$  and  $\lambda_o$ ; hence, the extinction rate was clearly non-zero. We then used maximum-likelihood  
148 to fit various functional forms for  $\lambda$  and  $\mu$  commonly used in the literature (25):  $\lambda$  was either i) assumed to  
149 be constant over time, ii) assumed to vary exponentially ( $\lambda(t) = \alpha e^{\beta t}$ ), iii) assumed to vary exponentially  
150 plus a constant ( $\lambda = \alpha e^{\beta t} + \gamma$ ), or iv) assumed to vary linearly ( $\lambda(t) = \lambda_o + \alpha t$ ). Similar profiles were  
151 considered for  $\mu$ , thus yielding  $4 \times 4$  alternative combinations. We refer to these 16 models as “ELC” models,  
152 for Exponential/Linear/Constant; depending on whether we constrain  $\mu$  to be non-negative or allow  $\mu$  to be  
153 negative, we call a fitted model “constrained” or “unconstrained”, respectively. For every tree we fit all  
154 16 ELC models and then selected the best fitted model using AIC, following common practice (13). It is  
155 worth noting that real diversification dynamics emerge from a myriad of complex biological/environmental  
156 processes that will probably never be exactly captured by any human-made mathematical model; instead, the  
157 typical objective is to find an approximate model that adequately describes the data at hand. To reduce errors  
158 in the estimated extinction rates stemming from poor model fits (26, 27) we only considered simulations  
159 where the best fitted model adequately described the data, as evaluated using parametric bootstrapping with  
160 a Kolmogorov-Smirnov test comparing the distribution of node ages in the tree versus the fitted model (380  
161 out of 500 simulations were kept). For every such simulation, we examined whether the estimated present-  
162 day extinction rate in the best constrained fitted model (denoted  $\hat{\mu}_o$ ) was zero. To each tree, we also fit an  
163 unconstrained version of the best model — i.e., using the same functional forms for  $\lambda$  and  $\mu$  but allowing  $\mu$   
164 to be negative, thus obtaining a potentially new estimate for the present-day extinction rate (denoted  $\hat{\mu}_o^*$ ).

165 For all considered simulated trees the best fitted constrained as well as unconstrained model closely  
166 matched the deterministic LTT of the true diversification scenario used in the simulation as well as the LTT  
167 of the simulated tree itself (fraction of explained variance  $R^2 \geq 0.99$  in all cases, Supplemental Fig. S1B),  
168 confirming that the fits were successful (examples in Supplemental Fig. S2). Despite the good fits and despite  
169 the large size of the input trees, present-day extinction rate estimates ( $\hat{\mu}_o$ ) poorly reflected the true extinction  
170 rates used in the simulations (Fig. 2A). This is consistent with our general argument that extinction rates  
171 cannot be reliably estimated from extant timetrees in the absence of further information, due to fundamental  
172 identifiability limits (17). Importantly, for 93 out of 380 simulated trees with sufficiently good fit (24.5%),  
173 the best supported constrained model yielded a present-day extinction rate estimate of exactly zero ( $\hat{\mu}_o = 0$ ,  
174 Fig. 2A and Fig. 3A). A zero  $\hat{\mu}_o$  is in conflict with the fact that the true extinction rate was at all times clearly  
175 non-zero ( $\mu \in [0.1 \cdot \lambda_o, \lambda_o]$ ). This fraction of zero extinction rate estimates is also much larger than what  
176 would be expected if extinction rate estimates were randomly and continuously distributed; in other words,  
177 the distribution of extinction rate estimates is zero-inflated, consistent with observations in the literature and  
178 with our predictions. Moreover, we did not observe any strong nor significant positive correlation between  
179 the goodness-of-fit (in terms of the deterministic LTT’s  $R^2$ , or in terms of the P-value of the Kolmogorov-  
180 Smirnov test for node ages) on the one hand and the relative estimation error ( $(\hat{\mu}_o - \mu_o)/\mu_o$ ) on the other  
181 hand ( $P > 0.05$  and Spearman’s  $\rho < 0.1$ , Supplemental Fig. S1), suggesting that zero-inflated extinction  
182 estimates are unlikely the result of poor model fits. In all cases where  $\hat{\mu}_o$  was zero, the unconstrained variant  
183 yielded a negative  $\hat{\mu}_o^*$ , again consistent with our predictions (Fig. 2C). Reciprocally, for nearly all trees  
184 with negative  $\hat{\mu}_o^*$  we obtained a zero  $\hat{\mu}_o$ , again consistent with our predictions (Fig. 2C). In particular, and in

185 contrast to  $\hat{\mu}_o$ , the distribution of  $\hat{\mu}_o^*$  was not zero-inflated (Fig. 3B). For trees where the fitted  $\hat{\mu}_o^*$  was positive,  
 186 the fitted  $\hat{\mu}_o$  was almost always identical to  $\hat{\mu}_o^*$  (up to numerical accuracy), again confirming our predictions  
 187 (Fig. 2C). These results confirm our interpretation that the zero-inflation of extinction rate estimates stems  
 188 from “cutting off” extinction rate estimates that would otherwise be negative (Fig. 2B, example in Fig. 4).

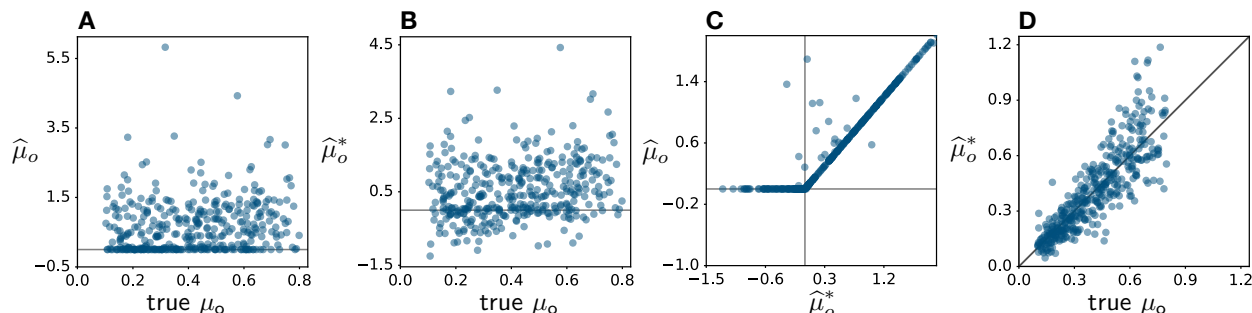

**Figure 2: Testing predictions using simulations.** (A) Present-day extinction rates fitted to 500 extant timetrees simulated under birth-death models with time-dependent  $\lambda$  and  $\mu$ , while requiring the fitted extinction rate to be non-negative (one point per tree). Various commonly used models (“ELC” models, described in the main text) were fitted, and the best fitted model was selected based on AIC. Vertical axis: fitted present-day extinction rate ( $\hat{\mu}_o$ ). Horizontal axis: true present-day extinction rates ( $\mu_o$ ). (B) Present-day extinction rates fitted to the same trees and with the same best models as in A, but allowing for negative extinction rates. (C) Present-day extinction rates fitted while allowing negative extinction rates ( $\hat{\mu}_o^*$ , horizontal axis) compared to the case where negative rates are not permitted ( $\hat{\mu}_o$ ), for the same trees as in A (one point per tree). (D) Present-day extinction rates  $\hat{\mu}_o$  (vertical axis) fitted while fixing the speciation rate  $\lambda$  to its true profile, compared to the true present-day extinction rate (horizontal axis). The diagonal is shown for reference. All simulated trees comprised a large number of tips (1000), to avoid estimation error due to small data sizes. All rates are expressed in  $\text{Myr}^{-1}$ . For histograms of the rate estimates see Fig. 3.

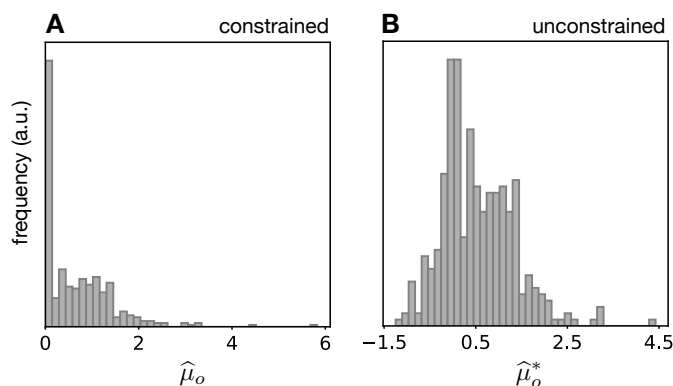

**Figure 3: Distribution of estimated  $\hat{\mu}_o$  and  $\hat{\mu}_o^*$ .** (A) Histogram of present-day extinction rates ( $\hat{\mu}_o$ ) estimated for 380 simulated timetrees (as in Fig. 2) based on the best fitted ELC model, while constraining extinction rates to be non-negative. Observe the clear zero-inflation of present-day extinction rate estimates. (B) Histogram of estimated present-day extinction rate ( $\hat{\mu}_o^*$ ) across the same timetrees as in (A), based on the same fitted ELC models as in (A) but allowing for negative extinction rates.

189 The above analyses reveal that the zero extinction rate estimates in our simulations resulted from a  
 190 restriction to non-negative rates in cases where the maximum-likelihood fit would actually be negative (if  
 191 allowed). Note that the frequent occurrence of likelihood peaks in biologically implausible regions of model  
 192 space (e.g., Fig. 1B), despite the large tree sizes, makes complete sense in light of model congruencies: When  
 193 fitting birth-death models one is at most estimating the congruence class of the true diversification history,

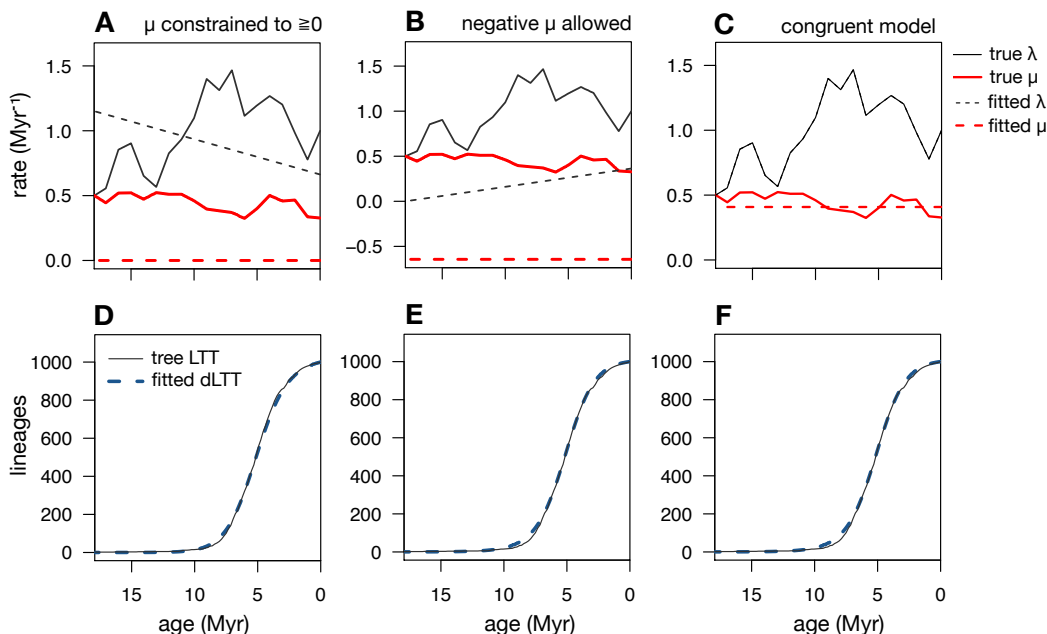

**Figure 4: Fitted models are approximately congruent to the true diversification scenarios.** Example ELC model fit (and selected according to AIC) to a simulated timetree with time-variable speciation rates ( $\lambda$ ) and extinction rates ( $\mu$ ). (A) True  $\lambda$  and  $\mu$  (continuous curves) compared to fitted  $\lambda$  and  $\mu$  (dashed curves), when  $\mu$  is constrained to be non-negative. (B) True  $\lambda$  and  $\mu$  (continuous curves) for the same tree as in A, compared to  $\lambda$  and  $\mu$  (dashed curves) fitted when  $\mu$  is allowed to be negative. The negative fitted  $\hat{\mu}_o^*$  suggests that in A the zero  $\hat{\mu}_o$  was simply “cut-off” at that boundary. (C) Diversification scenario congruent to the model fitted in B, but exhibiting the correct extinction rate; observe that this scenario is close to the true scenario, which means that the congruence class of the model fitted in B is close to the congruence class of the true scenario. (D–F) Lineages-through-time (LTT) curve of the simulated tree (continuous curves) compared to the deterministic LTTs of the fitted models shown in A–C. The good match between the tree’s LTT and the fitted models’ deterministic LTTs is consistent with the conclusion that the fitted models are close to the congruence class of the true scenario. For additional examples see Supplemental Fig. S3.

194 rather than the true diversification history itself, and this congruence class typically includes a myriad of  
 195 scenarios with negative extinction rates. For example, in the common case where specific parameterized  
 196 functional forms are fitted for  $\lambda$  and  $\mu$  (as is done here), one will obtain a combination of parameters whose  
 197 corresponding  $\lambda$  and  $\mu$  curves come closest to some member of the true diversification scenario’s congruence  
 198 class, even if the true diversification scenario was very different. This interpretation is supported by the  
 199 observation that for all considered simulations, the fitted model indeed closely matched the true scenario’s  
 200 deterministic LTT (dLTT, which fully determines the congruence class), even in cases where  $\hat{\mu}_o$  was zero  
 201 (Supplemental Fig. S2). To further test this interpretation, for each best fitted unconstrained model with  
 202 negative  $\hat{\mu}_o^*$ , we determined the unique congruent diversification scenario with the correct  $\mu$ , that is, the  
 203 member of the fitted model’s congruence class that happens to have the correct  $\mu$ . As expected, this congruent  
 204 scenario typically had a speciation rate profile close to the truth, confirming our interpretation that the fitted  
 205 models, even those with negative  $\hat{\mu}_o^*$ , are actually close to the true diversification scenario’s congruence class  
 206 (examples in Fig. 4C and Supplemental Fig. S3). Similarly, when we re-fitted ELC models to the trees while  
 207 fixing  $\lambda$  to its true profile, the extinction rate estimates were much more accurate and no longer zero-inflated  
 208 (in fact, none of them were zero, Fig. 2D), again consistent with our predictions.



209 The above results cannot be attributed to model-inadequacy, i.e., to the possibility that ELC models  
210 are not flexible enough to adequately approximate the true profiles of  $\lambda$  and  $\mu$  over time used in the sim-  
211 ulations, for three reasons. First, there is no reason to expect that this type of model inadequacy should  
212 lead to zero-inflated extinction rates, instead of simply a mix of over- and under-estimation errors. Second,  
213 and more importantly, in all considered simulations the best fitted constrained model matched the data well,  
214 based on a Kolmogorov-Smirnov test on the distribution of node ages and based on the fact that each tree's  
215 LTT (which contains all information in the context of birth-death models; (17, 28, 29)) was completely or  
216 nearly completely contained within the 95% confidence interval of LTTs generated by the best fitted model.  
217 Similarly, the deterministic LTTs (dLTTs) of the best fitted models closely resembled the dLTTs of the true  
218 scenarios used in the simulations ( $R^2 > 0.99$  in all cases, examples in Supplemental Fig. S2). Since the  
219 dLTT of a birth-death model fully determines its congruence class (17) and the probability distribution of  
220 generated trees (when  $\mu$  is non-negative), this means that the best fitted constrained and unconstrained mod-  
221 els indeed converged towards the true congruence class and that the best fitted constrained models would  
222 generate trees similar to those of the true diversification scenario; this pattern is fully consistent with our  
223 theory and rules out the possibility of serious model inadequacies. Third, as mentioned earlier, there was no  
224 significant positive correlation between the considered goodness of fit measures and the relative estimation  
225 error ( $(\hat{\mu}_o - \mu_o)/\mu_o$ , Supplemental Figs. S1A,B), contrary to what would be expected if model inadequacy  
226 caused a deflation of extinction rate estimates. Similarly, we did not observe a negative correlation between  
227 the considered goodness of fit measures and the absolute relative estimation error ( $|\hat{\mu}_o - \mu_o|/\mu_o$ , Supple-  
228 mental Figs. S1C,D), contrary to what would be expected if model inadequacy was the cause of erroneous  
229 (in any direction) extinction rate estimates.

## 230 Analysis of empirical timetrees

231 Next, to test the relevance of our interpretation to real datasets, we examined 121 previously published time-  
232 trees, spanning the eukaryotic Tree of Life. The size of the trees ranged from 13 to 11,638 species, and  
233 their root age ranged from 6.6 to 431 Myr. To facilitate comparison with our simulation results, we fit the  
234 same ELC models as described before and chose the best model based on AIC. The sampling fraction  $\rho$  was  
235 estimated separately based on the literature and fixed during model fitting (references and details in Supple-  
236 mental Data File 1). In each case, we either constrained  $\mu$  to be non-negative or allowed  $\mu$  to be negative,  
237 and compared the obtained present-day extinction rate estimates with or without the constraint ( $\hat{\mu}_o$  and  $\hat{\mu}_o^*$ ,  
238 respectively). To further avoid biases due to bad model fits, we omitted 8 trees for which the best fitted model  
239 was rejected based on the distribution of node ages and using a Kolmogorov-Smirnov test ( $P < 0.05$ ).

240 Similar to our simulations, for all 113 considered empirical trees the fitted models explained the data  
241 well, with each tree's LTT falling entirely or almost entirely within the 95% confidence interval of LTTs  
242 generated by the best fitted constrained model (Supplemental Fig. S4), and with the model's dLTT capturing  
243 nearly all of the variance of the tree's LTT ( $R^2 > 0.99$ , Supplemental Fig. S5E). For 37 out of 113 trees  
244 the fitted model exhibited a present-day extinction rate of exactly zero ( $\hat{\mu}_o = 0$ ); this high fraction of zero  
245 extinction rate estimates is consistent with the zero-inflated estimates commonly seen in the literature and in

246 our simulations. In all cases where  $\hat{\mu}_o = 0$ , the fitted  $\hat{\mu}_o^*$  was negative, whereas a positive  $\hat{\mu}_o$  nearly always  
247 coincided with a positive and identical  $\hat{\mu}_o^*$  (Fig. 5A), consistent with our predictions and our simulation  
248 results. We mention that, as in our simulations, it is easy to construct models congruent to the fitted models  
249 (even those with negative  $\hat{\mu}_o^*$ ) with plausible non-negative  $\lambda$  and  $\mu$ ; some of these congruent models are likely  
250 close to the taxon's true diversification history (17), although in contrast to our simulations it is impossible  
251 to know which ones those are.

252 As we discussed above, erroneous extinction estimates have previously been attributed to unmodeled  
253 variation in diversification rates *between* different lineages (12, 15) existing at any given time point. While  
254 previous research has not identified any mechanism by which such model inadequacy should generally lead  
255 to zero-inflated rate estimates, we nevertheless consider this possibility here. Specifically, for every tree we  
256 checked to what extent the best fitted model adequately explained not only variation through time (captured by  
257 the LTT) but also variation across lineages using parametric bootstrapping and four test statistics: the Sackin  
258 (21) and Colless (22) statistics, the distribution of edge lengths (using a Kolmogorov-Smirnov test), and the  
259 distribution of node ages (using a Kolmogorov-Smirnov test). Perhaps not surprisingly, a large fraction of  
260 models were rejected based on at least one of these tests, with only 40 out of 113 trees passing all tests —  
261 that is to say, many of the empirical datasets were not fully consistent with the fitted homogeneous birth-  
262 death models. Indeed, the majority of rejected models were rejected based on the basis of the Sackin and/or  
263 Colless test statistics, which are specifically designed to detect tree imbalances, for example caused by rate  
264 heterogeneities across lineages. For 13 of the 40 remaining trees, the best fitted models exhibited a zero  
265 extinction rate, which corresponds to a similar fraction as that observed in the larger tree set. Moreover, we  
266 did not observe any significant positive correlation between the statistical significance (P-value) of any of  
267 the deployed adequacy tests and  $\hat{\mu}_o^*$ , which one would expect if model inadequacies were the main cause of  
268 deflated extinction rate estimates (Spearman's rank correlations were either negative, or non-significant, see  
269 Supplemental Fig. S5). Hence, processes leading to deviations from the assumptions of birth-death models  
270 do not seem to provide a plausible alternative explanation for the high frequency of zero (or negative, if  
271 allowed) extinction rate estimates in these empirical trees.

## 272 Conclusions

273 The existence of vast stretches of congruent (i.e., statistically indistinguishable) and yet markedly different  
274 diversification scenarios severely compromises the reliability of extinction rate estimates based entirely on  
275 extant timetrees (17). However, even after our previous discovery (17), it was unclear whether and how  
276 model congruencies could explain the zero-inflated extinction rate estimates from extant timetrees widely  
277 observed in the literature. Here we have shown that these zero extinction estimates are probably due, at  
278 least in part, to the fact that numerical estimators will converge to the closest models in the congruence  
279 class of the true but unknown diversification history and not necessarily to the true diversification history  
280 itself — even if the closest models are biologically meaningless. Importantly, this can occur even if the data  
281 are well-described by the model (or more precisely, by its congruence class), that is, even in the absence  
282 of detectable model violations. It is of course possible that previously proposed mechanisms due to model

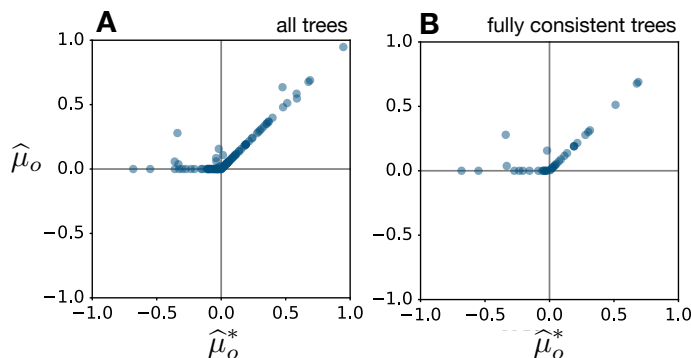

**Figure 5: Testing predictions with real data.** Present-day extinction rates estimated from empirical extant timetrees of various taxa (one point per tree), by fitting 9 commonly used models (“EC” models, explained in the main text) and choosing the best model via AIC. Horizontal axes show the fitted extinction rate while allowing for negative extinction rates ( $\hat{\mu}_o^*$ ), vertical axes show the fitted extinction rate when negative rates are not allowed ( $\hat{\mu}_o$ ). All units are in  $\text{Myr}^{-1}$ . (A) Showing all trees where the best fitted model adequately explains the distribution of node ages (using a Kolmogorov-Smirnov test). (B) Showing only trees where the best fitted model also adequately explains the distribution of edge lengths (using a Kolmogorov-Smirnov test), the tree’s Sacking and Colless imbalance statistics. Only trees with a fitted  $\hat{\mu}_o < 1 \text{ Myr}^{-1}$  are shown in order to focus on near-zero and negative rate estimates.

283 inadequacy or misspecification (8, 12, 15) also lead to erroneous extinction rate estimates.  
284 However, none of these mechanisms has been shown to explain the zero-inflation of extinction estimates. In  
285 fact, our observation that the proportion of zero extinction estimates was similar for those empirical trees that  
286 passed all four of our model adequacy tests versus those that didn’t, suggests that model inadequacy is not  
287 an important additional cause of zero-inflated extinction estimates in real datasets. Regardless of whether  
288 our proposed mechanism is the sole or even main cause of zero-inflated extinction estimates, our results  
289 clearly show that highly erroneous zero-inflated extinction estimates occur even in situations without any  
290 detectable model inadequacy and even for large trees with thousands of tips. Our results lead us to concur  
291 with other researchers that many previous estimates of extinction rates from extant timetrees alone are not  
292 reliable (12), and that most zero extinction rate estimates from such studies are almost certainly wrong (2).  
293 More generally, our findings provide a clear case in point that birth-death model congruencies have likely  
294 been seriously confounding macroevolutionary studies for decades.

## 295 **Materials and Methods**

296 All simulations and maximum-likelihood fitting of birth-death models were performed using the R package  
297 *castor* v1.6.5 (30). All simulated trees had 1000 tips. All times are measured in Myr, and rates are  
298 measured in  $\text{Myr}^{-1}$ . To simulate a variety of diversification scenarios we generated random profiles for  
299  $\lambda$  and  $\mu$  according to independent Ornstein-Uhlenbeck (OU) stochastic processes (23). This approach  
300 was chosen in order to cover a wide range of diversification scenarios with realistic temporal complexity.  
301 For  $\lambda$ , the present-day value  $\lambda_o$  (serving as initial condition for the OU process) was set to  $1 \text{ Myr}^{-1}$ ,  
302 the stationary expectation was set to  $\lambda_o$ , the stationary standard deviation was set to  $0.5 \cdot \lambda_o$  and the  
303 relaxation rate was set to  $0.1 \text{ Myr}^{-1}$ . For  $\mu$ , the present-day value  $\mu_o$  was chosen randomly between

304  $0.1 \cdot \lambda_o$  and  $0.8 \cdot \lambda_o$ , the stationary expectation was set to  $\mu_o$ , the stationary standard deviation was set to  
305  $0.5 \cdot \mu_o$  and the relaxation rate was set to  $0.1 \text{ Myr}^{-1}$ . Both  $\lambda$  and  $\mu$  were specified on a discrete time grid  
306 spanning 100 Myr and having a time-step of 1 Myr, according to the exact distribution of OU paths, with  
307 the exception that values below  $0.1 \text{ Myr}^{-1}$  were replaced with  $0.1 \text{ Myr}^{-1}$  to ensure that speciation and  
308 extinction rates were always above a detectable threshold. The sampling fraction  $\rho$  was chosen randomly  
309 and uniformly on a logarithmic scale from 0.01 to 1. For every given profile for  $\lambda$  and  $\mu$  and chosen  
310  $\rho$ , we simulated an extant timetree using the castor function `generate_tree_hbd_reverse` (31).  
311 We then fitted ELC models to the tree using the castor function `fit_hbd_model_parametric`  
312 with appropriately defined functional forms for each ELC model (see main text for functional  
313 forms) and with options “`condition='auto'`, `relative_dt=1e-3`, `max_start_attempts=100`,  
314 `fit_control=list(eval.max=10000, iter.max=1000, rel.tol=1e-12, step.min=0.0001)`”.  
315 Fitting was agnostic of the simulation parameters, i.e., as if no further information was available apart  
316 from the tree itself and the sampling fraction  $\rho$  (which was fixed to its true value). As a first guess for the  
317 parameters (option “`param_guess`”) we set the exponent (in the case of exponentially varying rates) to zero,  
318 and the present-day rates to values obtained by first fitting a constant-rates BD model with known  $\rho$ . The  
319 bounds or the fitted parameters were chosen such that  $\mu$  was necessarily non-negative. After fitting all ELC  
320 models to a tree, we chose the ELC model that had the smallest AIC, following common practice. We then  
321 re-fitted that model with parameter bounds adjusted to allow for negative  $\mu$ , and compared the estimated  
322 present-day  $\mu_o$  obtained with and without constraining  $\mu$  to non-negative values ( $\hat{\mu}_o$  and  $\hat{\mu}_o^*$ , respectively).  
323 To also examine how the extinction rate estimates change if  $\lambda$  was known (Fig. 2D), we re-fitted ELC  
324 models (and selected the best model via AIC) while setting  $\lambda$  to its true profile over time. To construct  
325 diversification scenarios congruent to the fitted models, but with the correct  $\mu$  (e.g. Fig. 4C), we used the  
326 castor function `simulate_deterministic_hbd`.

327 Extant timetrees of 121 eukaryotic taxa were obtained from the literature; many of these timetrees  
328 had been previously collected from the literature by Henao Diaz *et al.* (32), and some were obtained by  
329 extracting sub-trees corresponding to recognized taxa (families or orders) from a large mammal tree (33)  
330 or avian tree (34). Taxon-specific sub-trees were only extracted if the tips associated with the taxon indeed  
331 formed a monophyletic clade in the original tree, based on the NCBI taxonomy (status December 3, 2020).  
332 The sampling fraction  $\rho$  of each tree was calculated based on published estimates of the taxon’s total number  
333 of extant species; tree sources and literature references are given in Supplemental Data File 1. To each tree,  
334 we fit all ELC models while fixing  $\rho$  and chose the best supported ELC model according to the AIC (35).

335 Statistical tests for model adequacy were performed using parametric bootstrapping (26, 27), as fol-  
336 lows. For a given tree and a given fitted model to be evaluated, we simulated 1000 random trees from the  
337 model, fixing the number of tips and the root age to match those of the original tree. Simulations were  
338 performed using the castor function `generate_tree_hbd_reverse` (31). For every simulated tree, we cal-  
339 culated the Sackin statistic (21) (denoted  $\sigma$ ), and then calculated the mean Sackin statistic across all simulated  
340 trees (denoted  $\bar{\sigma}$ ). The statistical significance of the tree’s Sackin statistic (denoted  $\sigma_o$ ) was the fraction of  
341 simulated trees for which  $|\sigma - \bar{\sigma}|$  was greater than  $|\sigma_o - \bar{\sigma}|$ . A similar approach was taken for the Colless

342 (22) statistic. To compare the distribution of node ages (times before present) of the fitted model to the tree,  
343 we used a Kolmogorov-Smirnov test. Specifically, for every simulated tree we calculated the empirical cu-  
344 mulative distribution function (CDF) of the node ages (denoted  $F$ ), evaluated at the original tree's node ages  
345 via linear interpolation, and then calculated the average of those CDFs, thus obtaining an estimate for the  
346 CDF of node ages expected under the model (denoted  $\bar{F}$ ). The Kolmogorov-Smirnov (KS) distance between  
347 a tree's CDF  $F$  and  $\bar{F}$ , denoted  $D(F, \bar{F})$ , is the maximum distance between  $F$  and  $\bar{F}$  at any age. The statisti-  
348 cal significance of the original tree's KS distance  $D(F_o, \bar{F})$  was calculated as the fraction of simulated trees  
349 for which  $D(F, \bar{F})$  was larger than  $D(F_o, \bar{F})$ . A similar approach was followed for comparing the model's  
350 and tree's distribution of edge lengths. The full array of statistical tests is implemented in the castor function  
351 `model_adequacy_hbd` (30). In all tests, the statistical significance threshold was set to 5%.

## 352 Acknowledgements

353 We thank L. Harmon, J. Rolland, B. Neto-Bradley, K. Kaur, and L.F. Henao Diaz for comments on the  
354 manuscript. MWP was supported by a NSERC Discovery Grant. SL was supported by a startup grant by the  
355 University of Oregon.

## 356 Code availability

357 R code for performing our analyses is available at: [www.loucalab.com/archive/ZeroExtinction](http://www.loucalab.com/archive/ZeroExtinction)

## 358 Author contributions

359 Both authors contributed equally to this work.

## 360 References

- 361 [1] MacLeod N (2014) The geological extinction record: History, data, biases, and testing. *Geological*  
362 *Society of America Special Papers* 505:1–28.
- 363 [2] Marshall CR (2017) Five palaeobiological laws needed to understand the evolution of the living biota.  
364 *Nature Ecology & Evolution* 1(6):165.
- 365 [3] Pimm SL et al. (2014) The biodiversity of species and their rates of extinction, distribution, and pro-  
366 tection. *Science* 344(6187):1246752.
- 367 [4] Nee S, Holmes EC, May RM, Harvey PH (1994) Extinction rates can be estimated from molecular  
368 phylogenies. *Philosophical Transactions: Biological Sciences* 344(1307):77–82.

- 369 [5] Losos JB, Schluter D (2000) Analysis of an evolutionary species–area relationship. *Nature*  
370 408(6814):847–850.
- 371 [6] Turgeon J, Stoks R, Thum RA, Brown JM, McPeck MA (2005) Simultaneous quaternary radiations of  
372 three damselfly clades across the holarctic. *The American Naturalist* 165(4):E78–E107.
- 373 [7] Nee S (2006) Birth-death models in macroevolution. *Annual Review of Ecology, Evolution, and Sys-*  
374 *tematics* 37(1):1–17.
- 375 [8] Purvis A (2008) Phylogenetic approaches to the study of extinction. *Annual Review of Ecology, Evo-*  
376 *lution, and Systematics* 39(1):301–319.
- 377 [9] Steeman ME et al. (2009) Radiation of extant cetaceans driven by restructuring of the oceans. *Systematic*  
378 *Biology* 58(6):573–585.
- 379 [10] Quental TB, Marshall CR (2010) Diversity dynamics: molecular phylogenies need the fossil record.  
380 *Trends in Ecology & Evolution* 25(8):434–441.
- 381 [11] Herrera JP (2017) Primate diversification inferred from phylogenies and fossils. *Evolution*  
382 71(12):2845–2857.
- 383 [12] Rabosky DL (2010) Extinction rates should not be estimated from molecular phylogenies. *Evolution*  
384 64(6):1816–1824.
- 385 [13] Morlon H, Parsons TL, Plotkin JB (2011) Reconciling molecular phylogenies with the fossil record.  
386 *Proceedings of the National Academy of Sciences* 108(39):16327–16332.
- 387 [14] Beaulieu JM, O’Meara BC (2015) Extinction can be estimated from moderately sized molecular phy-  
388 logenies. *Evolution* 69(4):1036–1043.
- 389 [15] Rabosky DL (2016) Challenges in the estimation of extinction from molecular phylogenies: a response  
390 to beaulieu and o’meara. *Evolution* 70(1):218–228.
- 391 [16] Foote M (2003) Origination and extinction through the phanerozoic: a new approach. *The Journal of*  
392 *Geology* 111(2):125–148.
- 393 [17] Louca S, Pennell MW (2020) Extant timetrees are consistent with a myriad of diversification histories.  
394 *Nature* 580:502–505.
- 395 [18] Pagel M (2020) Evolutionary trees can’t reveal speciation and extinction rates. *Nature* 580:461–462.
- 396 [19] Stadler T, Steel M (2019) Swapping birth and death: Symmetries and transformations in phylodynamic  
397 models. *Systematic Biology* 68(5):852–858.
- 398 [20] McGuire JA et al. (2014) Molecular phylogenetics and the diversification of hummingbirds. *Current*  
399 *Biology* 24(8):910–916.

- 400 [21] Sackin MJ (1972) 'good' and 'bad' phenograms. *Systematic Biology* 21(2):225–226.
- 401 [22] Shao KT (1990) Tree balance. *Systematic Biology* 39(3):266–276.
- 402 [23] Uhlenbeck GE, Ornstein LS (1930) On the theory of the Brownian motion. *Physical Review* 36:823–  
403 841.
- 404 [24] Alroy J (2008) Dynamics of origination and extinction in the marine fossil record. *Proceedings of the*  
405 *National Academy of Sciences* 105(Supplement 1):11536–11542.
- 406 [25] Rabosky DL, Lovette IJ (2008) Explosive evolutionary radiations: decreasing speciation or increasing  
407 extinction through time? *Evolution: International Journal of Organic Evolution* 62(8):1866–1875.
- 408 [26] Brown JM, Thomson RC (2018) Evaluating model performance in evolutionary biology. *Annual Review*  
409 *of Ecology, Evolution, and Systematics* 49(1):95–114.
- 410 [27] Schwery O, O'Meara BC (2020) Boskr-testing adequacy of diversification models using tree shape.  
411 *bioRxiv*.
- 412 [28] Nee S, May RM, Harvey PH (1994) The reconstructed evolutionary process. *Philosophical Transac-*  
413 *tions of the Royal Society of London B: Biological Sciences* 344(1309):305–311.
- 414 [29] Lambert A, Stadler T (2013) Birth–death models and coalescent point processes: The shape and prob-  
415 ability of reconstructed phylogenies. *Theoretical Population Biology* 90:113–128.
- 416 [30] Louca S, Doebeli M (2018) Efficient comparative phylogenetics on large trees. *Bioinformatics*  
417 34(6):1053–1055.
- 418 [31] Louca S (2020) Simulating trees with millions of species. *Bioinformatics* 36(9):2907–2908.
- 419 [32] Hena Diaz LF, Harmon LJ, Sugawara MTC, Miller ET, Pennell MW (2019) Macroevolutionary diver-  
420 sification rates show time dependency. *Proceedings of the National Academy of Sciences* 116(15):7403.
- 421 [33] Upham NS, Esselstyn JA, Jetz W (2019) Inferring the mammal tree: Species-level sets of phylogenies  
422 for questions in ecology, evolution, and conservation. *PLoS biology* 17(12):e3000494.
- 423 [34] Jetz W et al. (2014) Global distribution and conservation of evolutionary distinctness in birds. *Current*  
424 *Biology* 24(9):919–930.
- 425 [35] Akaike H (1981) Likelihood of a model and information criteria. *Journal of Econometrics* 16(1):3–14.

## 426 Supplementary Materials

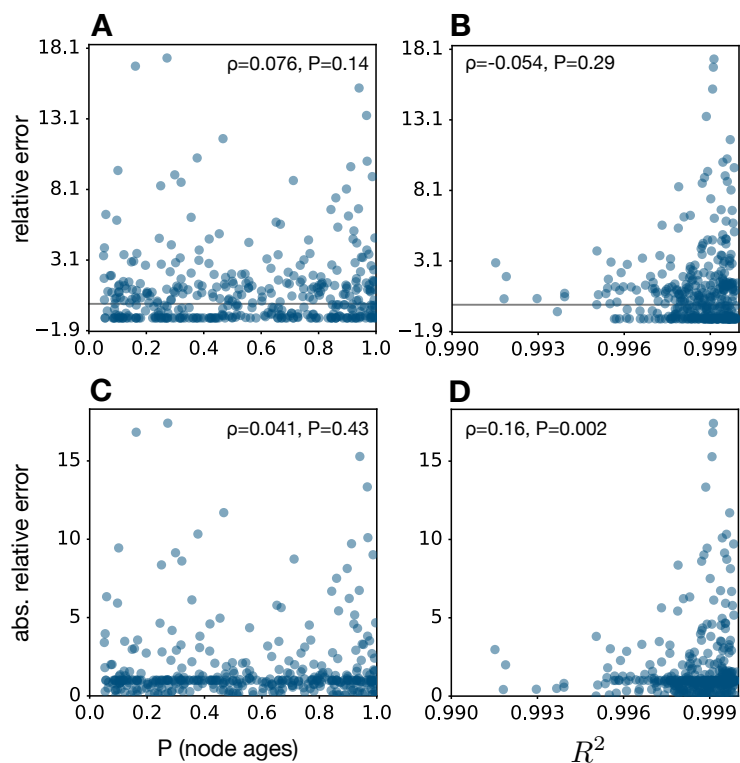

**Figure S1: Relative estimation error vs. model adequacy (simulated trees).** (A) Statistical significance of the Kolmogorov-Smirnov test for the distribution of node ages (horizontal axis) in 380 simulated trees under their best fitted constrained ELC models (one point per tree), compared to the relative error of the present-day extinction rate estimated under that model ( $(\hat{\mu}_o - \mu_o) / \mu_o$ , where  $\mu_o$  is the present-day extinction rate of the true diversification scenario used in the simulations). The Spearman's rank correlation between the relative error and the Kolmogorov-Smirnov test significance, as well as the two-sided statistical significance of that correlation, are shown inside the figure. (B) Similar to A, but with the horizontal axis showing the fraction of variance ( $R^2$ ) in the true scenario's dLTT captured by the fitted model's dLTT. Observe that all fitted models nearly exactly reproduced the dLTT of the true scenario, which means that the fitted models indeed converged towards the true scenario's congruence class (as expected).



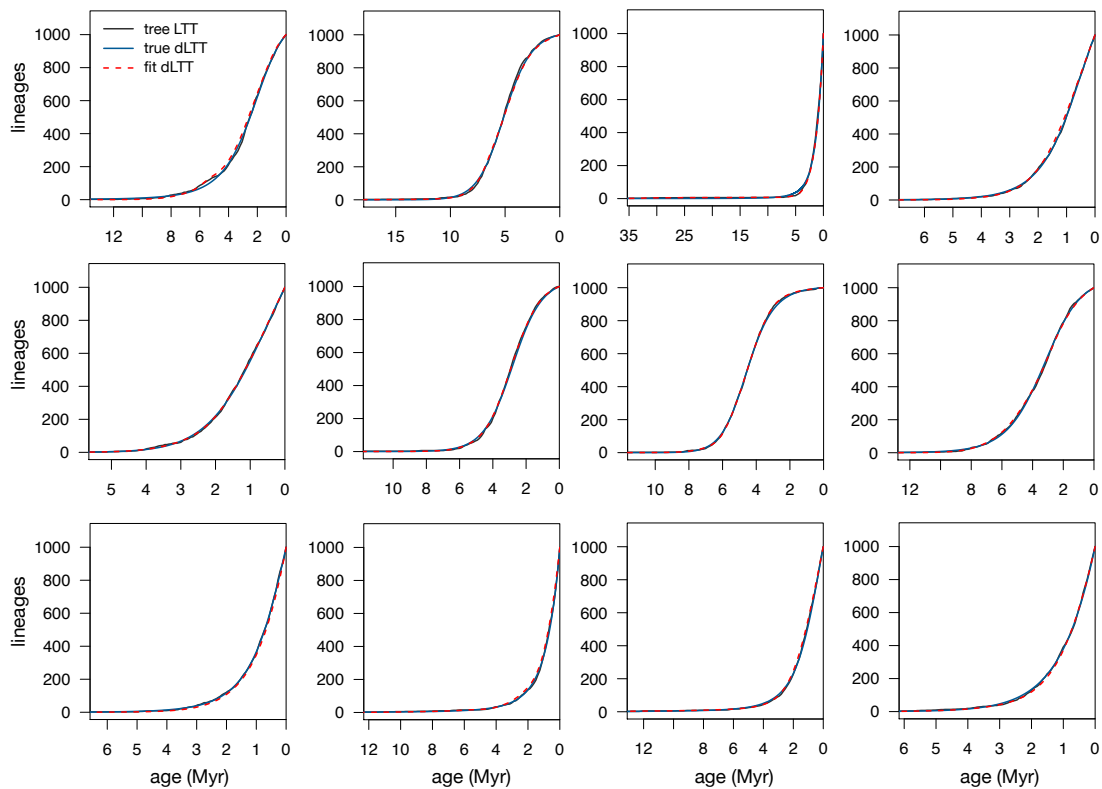

**Figure S2: LTTs of trees vs. fitted models (simulated trees).** Typical lineages-through-time (LTT) curves of timetrees simulated under various hypothetical diversification scenarios (continuous black curves), compared to the deterministic LTTs of the true generating diversification scenario (blue continuous curves) and the deterministic LTTs of the best fitted constrained ELC models (red dashed curves). In all examples shown the estimated present-day extinction rate ( $\hat{\mu}_0$ ) was zero.

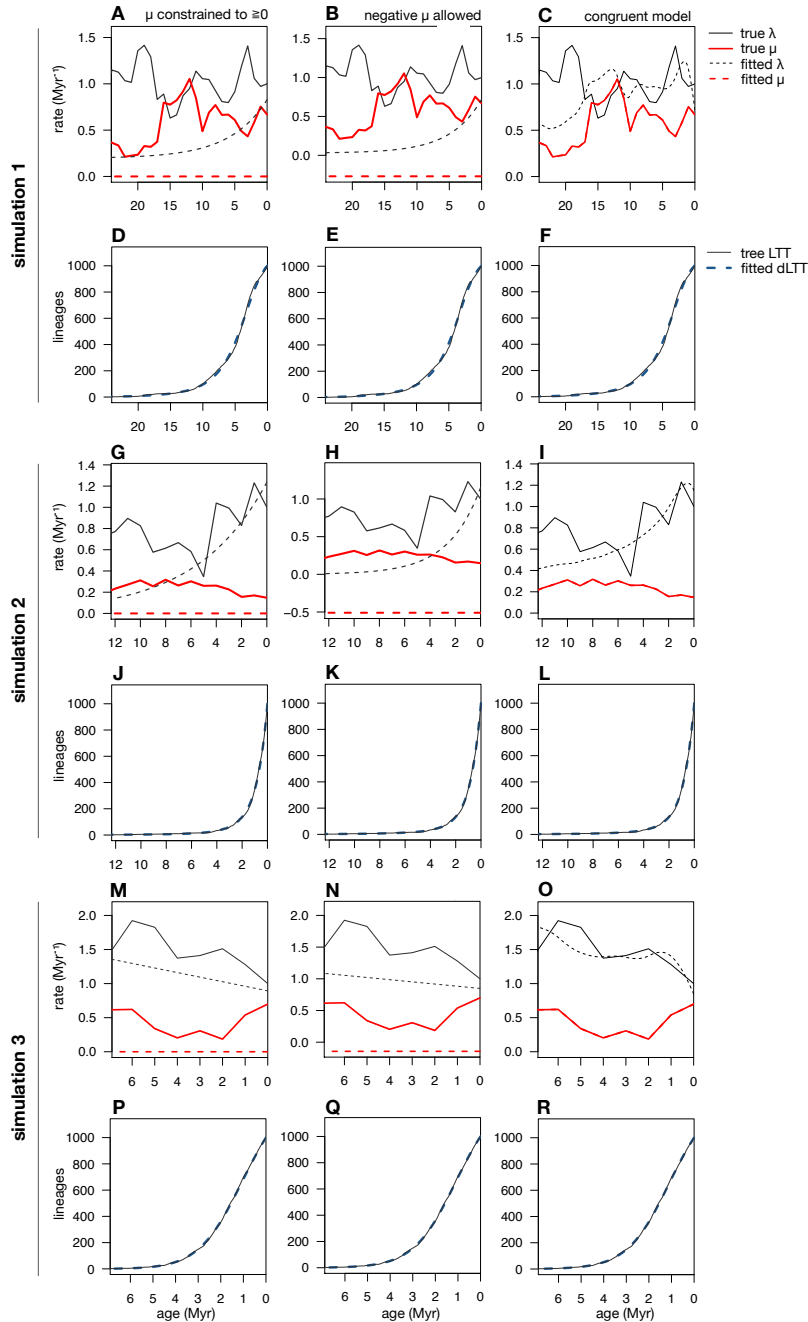

**Figure S3: Fitted models are approximately congruent to the true diversification scenarios (simulated trees).**

Example ELC models fit (and selected according to AIC) to simulated timetrees with time-variable speciation rates ( $\lambda$ ) and extinction rates ( $\mu$ ). (A) True  $\lambda$  and  $\mu$  (continuous curves) compared to the  $\lambda$  and  $\mu$  of the fit model (dashed curves), when  $\mu$  is constrained to be non-negative. (B) True  $\lambda$  and  $\mu$  (continuous curves) for the same tree as in A, compared to  $\lambda$  and  $\mu$  (dashed curves) fitted when  $\mu$  is allowed to be negative. (C) Model congruent to the model fitted in B, but exhibiting the correct extinction rate; observe that this model is close to the true diversification history, which means that the congruence class of the model fitted in B is close to the congruence class of the true diversification scenario. (D–F) Lineages-through-time (LTT) curve of the simulated tree (continuous curves) compared to the deterministic LTTs of the fitted models shown in A–C. The good match between the tree’s LTT and the fitted models’ deterministic LTTs is consistent with the conclusion that the fitted models are close to the congruence class of the true diversification scenario. (G–R) Similar to A–F, for 3 additional diversification scenarios.

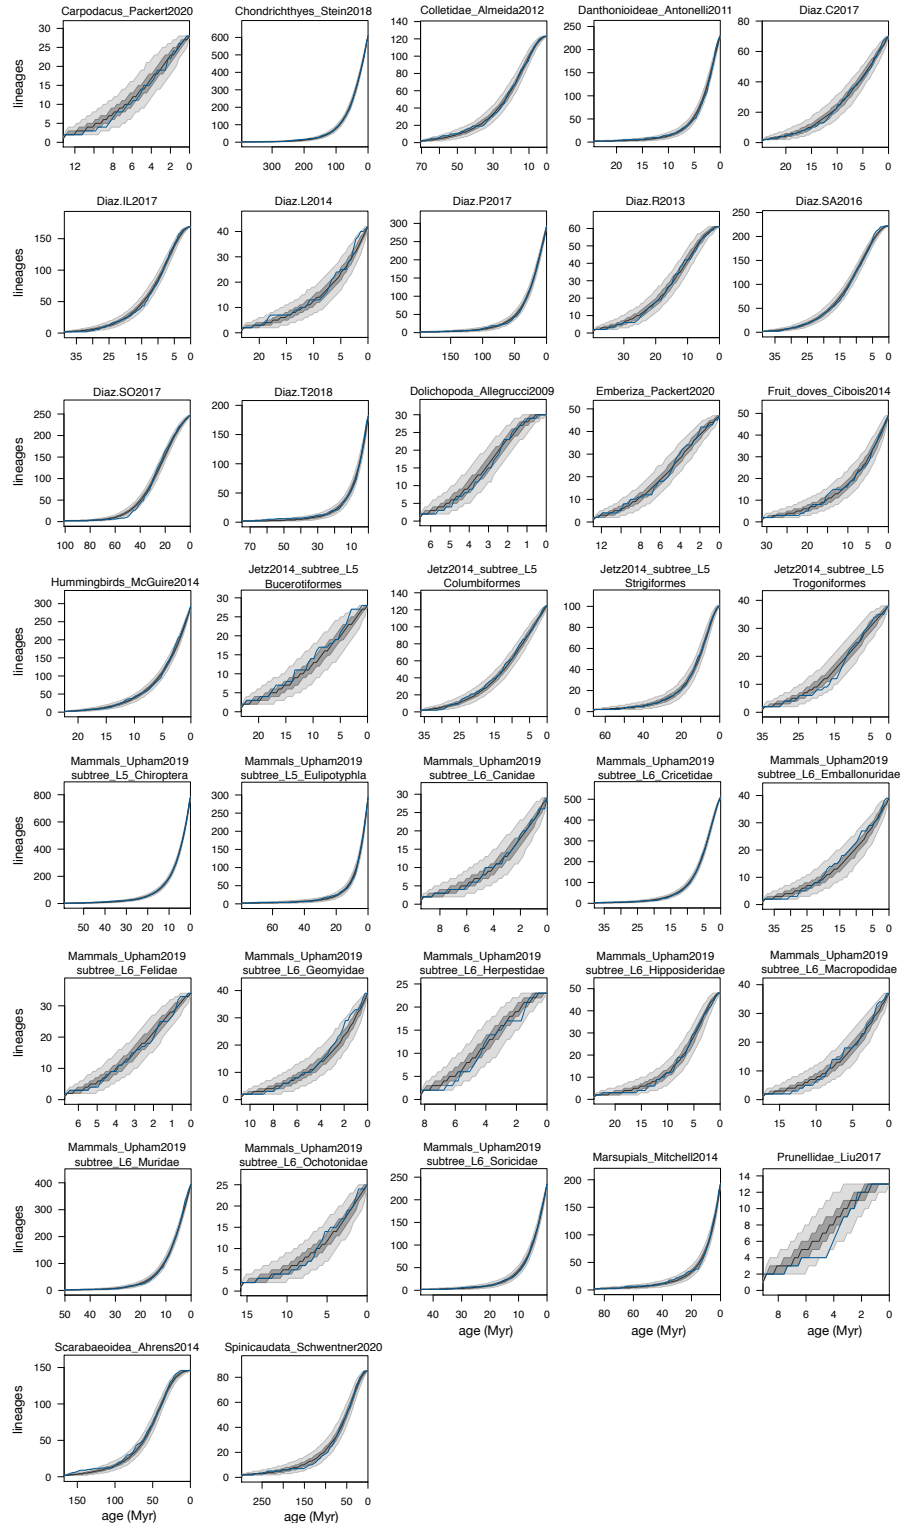

**Figure S4: LTTs of trees vs. fitted models (empirical trees).** Lineages-through-time (LTT) curves of the 37 empirical trees for which the best fitted ELC model adequately described the tree's node distribution (based on a Kolmogorov-Smirnov test) and for which the predicted present-day extinction rate was zero (if constrained) or negative (if unconstrained). Blue curves show the LTTs of the trees, black curves show the median LTT generated by the fitted model, and dark and light shades show the 50% and 95% equal-tailed confidence intervals of LTTs generated by the fitted model. Note the large consistency between the tree LTTs and the LTTs generated by the fitted models.

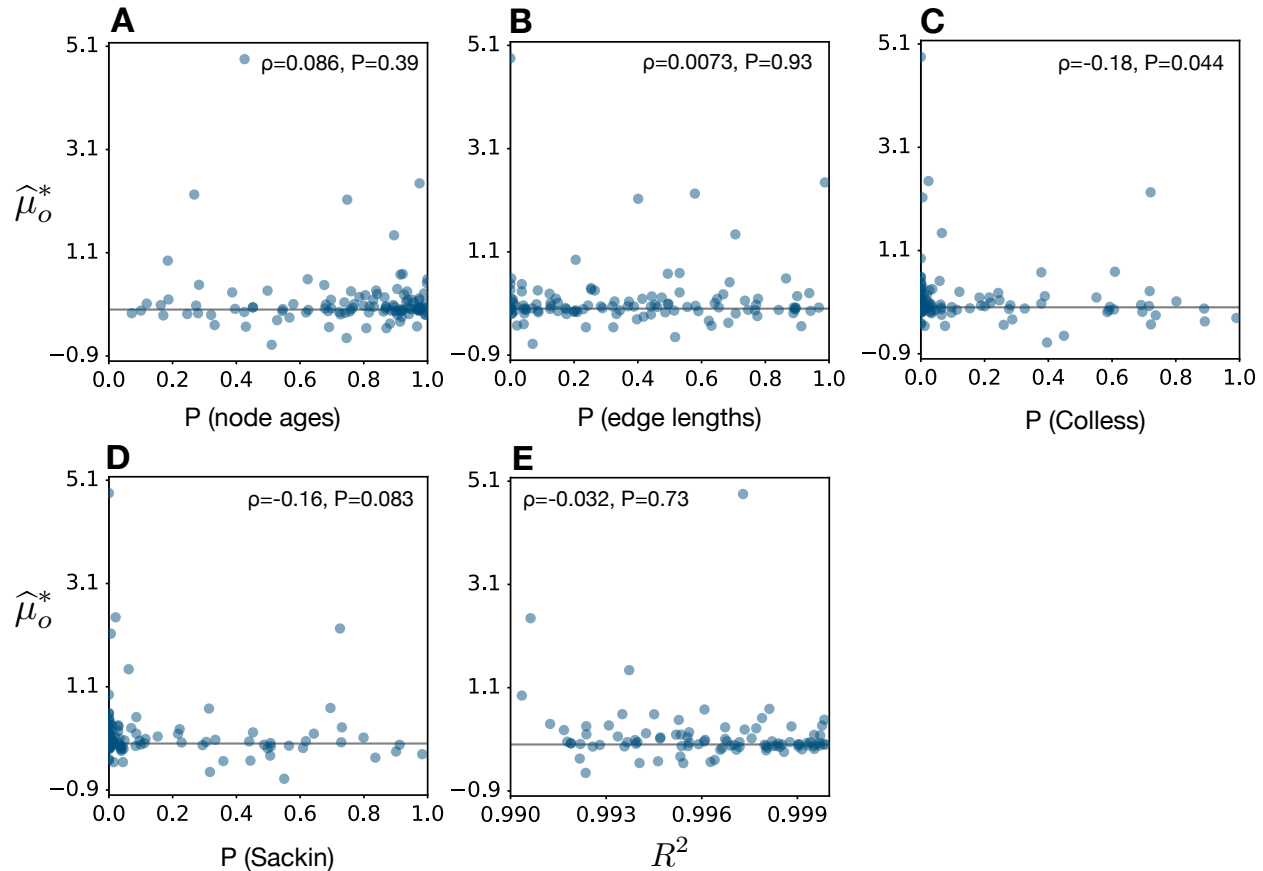

**Figure S5: Extinction rate estimates vs. model adequacy (empirical trees).** (A) Statistical significance of the Kolmogorov-Smirnov test for the distribution of node ages (horizontal axis) in empirical trees under their best fitted ELC models (one point per tree), compared to the present-day extinction rate estimated under that model ( $\hat{\mu}_o^*$ , allowing for negative extinction rates). The Spearman's rank correlation between  $\hat{\mu}_o^*$  and the Kolmogorov-Smirnov test significance, as well as the two-sided statistical significance of that correlation, are shown inside the figure. (B) Similar to A, but for the distribution of edge lengths. (C) Statistical significance of each tree's Colless statistic (horizontal axis) under the best fitted ELC model, compared to the corresponding  $\hat{\mu}_o^*$  (one point per tree). (D) Similar to C, but for the Sackin statistic. (E) Fraction of variance in the tree's LTT explained by the fitted model's dLTT ( $R^2$ ), compared to the corresponding  $\hat{\mu}_o^*$  (one point per tree). None of the metrics shown in the horizontal axes (P-values and  $R^2$ ) were found to significantly positively correlate with  $\hat{\mu}_o^*$ , suggesting that model inadequacy unlikely drives the many negative (or zero, if constrained) extinction rate estimates.
